# Supplementary material for: A Dual Role for the Placenta and Human Amniotic Epithelial Cells in HER3-Targeted Nanotherapy
Source: Research Square preprint supplement (doi:10.21203/rs.3.rs-9107787/v1), 2026-05-20
Supplement: Supplementary file 1 [file 16e01c216b2812be44b5a705.docx]

**Supplementary Figure S1. Immunofluorescence characterization of HER3 expression across amniotic regions.** Images provided illustrate the intensity of immunofluorescence of HER3 and epithelial marker in amniotic membranes from different compartments. The images include reflected amnion, placental amnion, and umbilical cord epithelium. The tissue was stained with DAPI (blue) to highlight the nuclei, pan-cytokeratin (green) to highlight the epithelial structure, and HER3 (red) to highlight the location of the receptor. For all types of amniotic membranes, it is evident that the epithelial structure is highlighted by the presence of pan-cytokeratin, indicating the structural integrity of the amniotic epithelium. The presence of HER3 is evident in all types of amniotic membranes, mainly in cytokeratin-positive epithelial cells, except for differences in staining intensity. The placental amnion has a thicker epithelial layer. Reflected amnion shows a well-organized but thinner epithelial layer. Umbilical cord amnion exhibits a relatively thinner epithelial structure. Merged images confirm co-localization of HER3 within epithelial compartments and minimal staining within deeper stromal layers.

**Supplementary Figure S2. Compartment-specific localization of HER3 in human umbilical cord tissue.** Images provided are characteristic of the immunofluorescence staining of HER3 localization within the human umbilical cord tissue. The tissue sections are stained using DAPI (blue fluorescence for the nucleus), pan-cytokeratin (green fluorescence for epithelial tissue), and HER3 (red fluorescence for the localization of the receptors). As expected, the expression of pan-cytokeratin is restricted and mainly associated with epithelial tissue, whereas the majority of the umbilical cord tissue is composed of other tissue types. The expression of HER3 is observed within the vascular tissue, showing increased expression within the endothelial layers compared to the Wharton’s jelly region. Merged images confirm compartment-specific distribution and highlight the preferential localization of HER3 within vascular elements rather than stromal matrix.

**Supplementary Figure S3. Molecular design, self-assembly mechanism, and structural modeling of HPK2.0-based nanocapsids and the HerLLAA complex.**

**(A)** Schematic of HPK2.0 self-assembly. HPK2.0 monomers form pentameric capsomeres. Neutralization of the lysine-rich K10 region reduces charge repulsion and allows binding to negatively charged therapeutic cargo. This interaction promotes assembly into a stable, drug-loaded nanoparticle that retains the HER3-targeting domain for selective binding to HER3-expressing cells. **(B)** Predicted three-dimensional model of the HPK2.0 pentamer, showing five subunits arranged symmetrically around a central core. The outward-facing domains support receptor recognition and structural stability. **(C)** Structural model of the HerLLAA complex, showing the assembled nanoparticle containing oligonucleotide cargo. The multimeric structure supports both stability and receptor-mediated targeting
